# Supplementary material for: Deep-Learning Based Estimation of Dielectrophoretic Force
Source: MDPI journal article supplement (doi:10.3390/mi13010041), 2021-12-28
Supplement: s1 [file s1]

## Supplementary Material

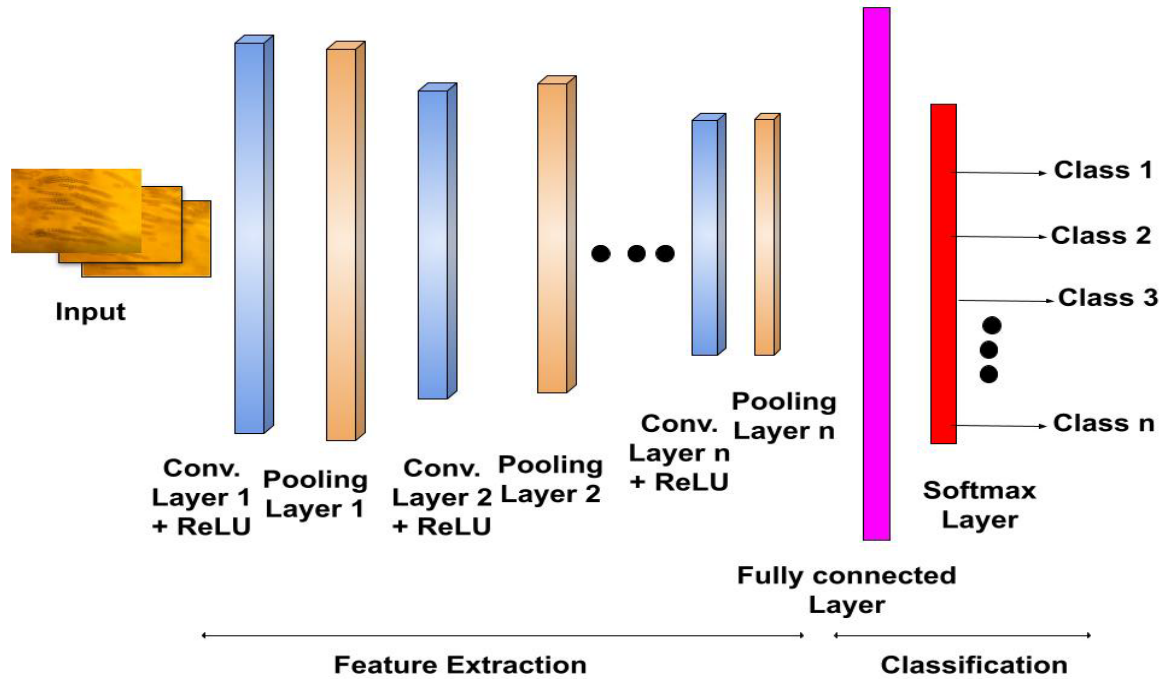

Figure S1: Convolutional neural network architecture.

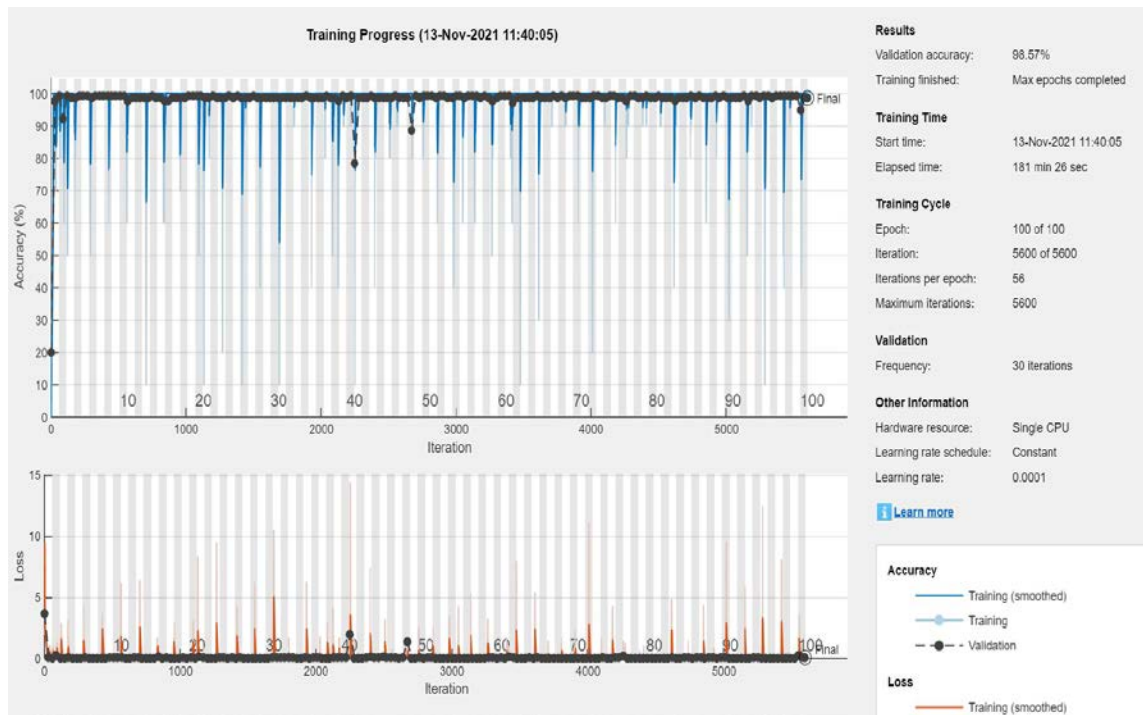

Figure S2: Training progress showing the validation accuracy of AlexNet.

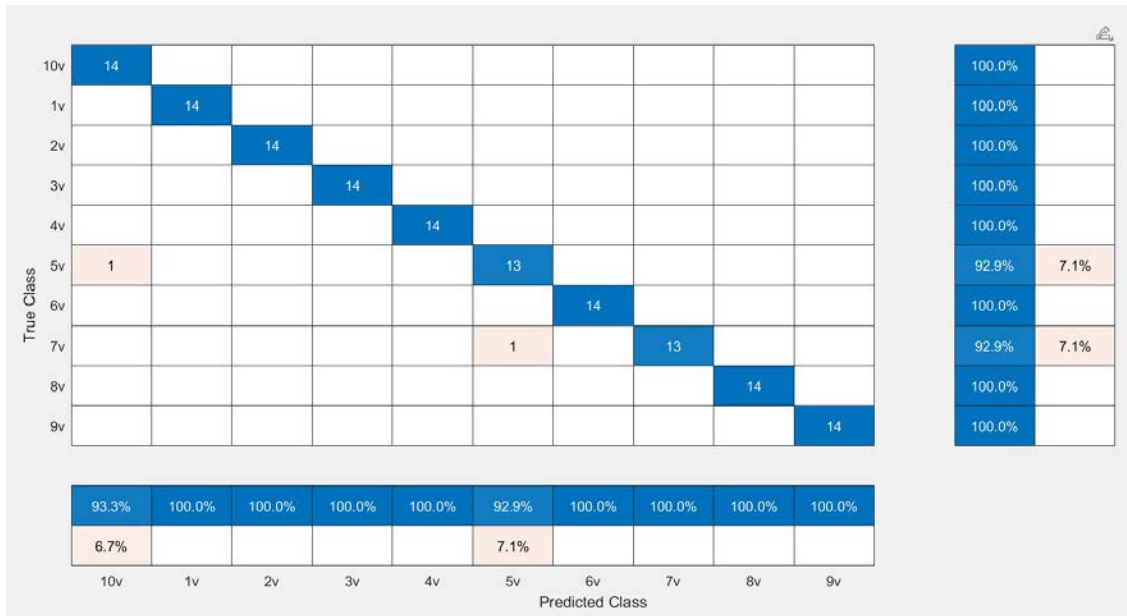

Figure S3: Confusion matrix of AlexNet.

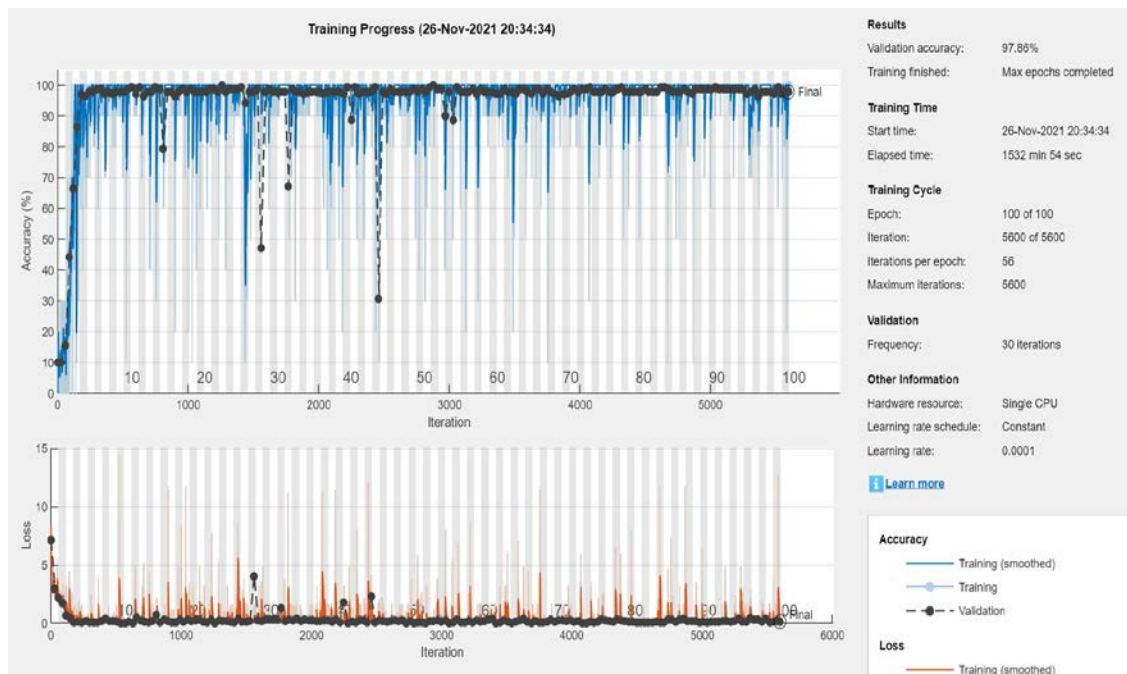

Figure S4: Training progress showing the validation accuracy of VGG19.

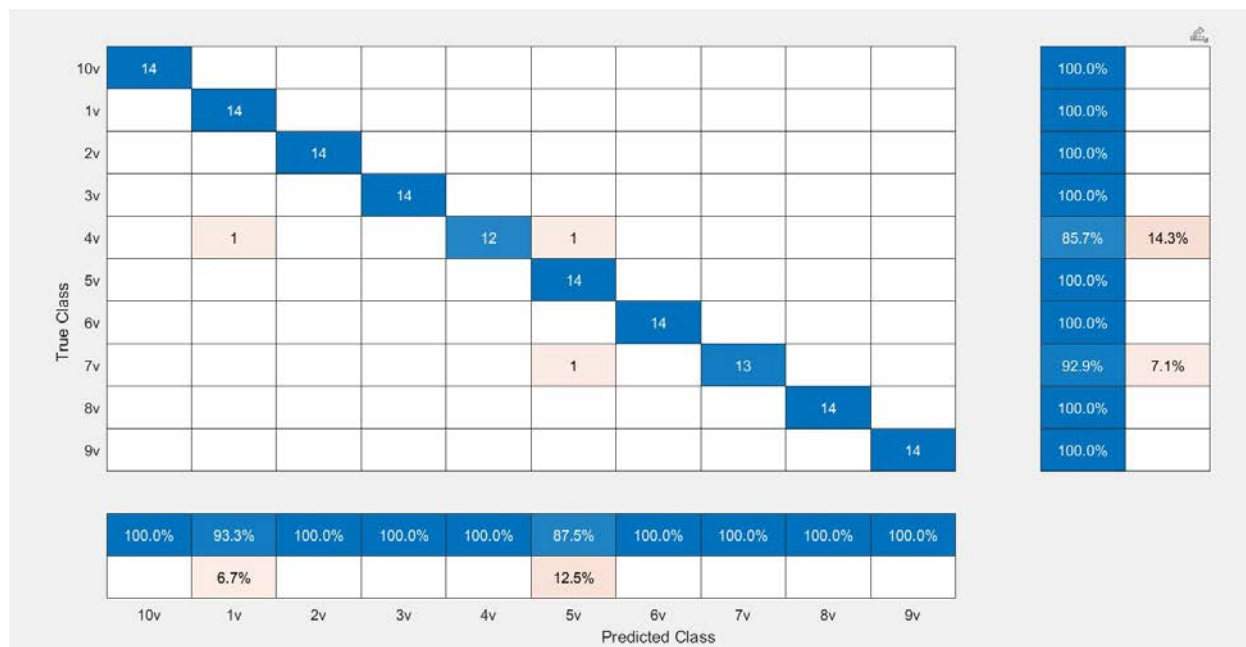

Figure S5: Confusion matrix of VGG19.

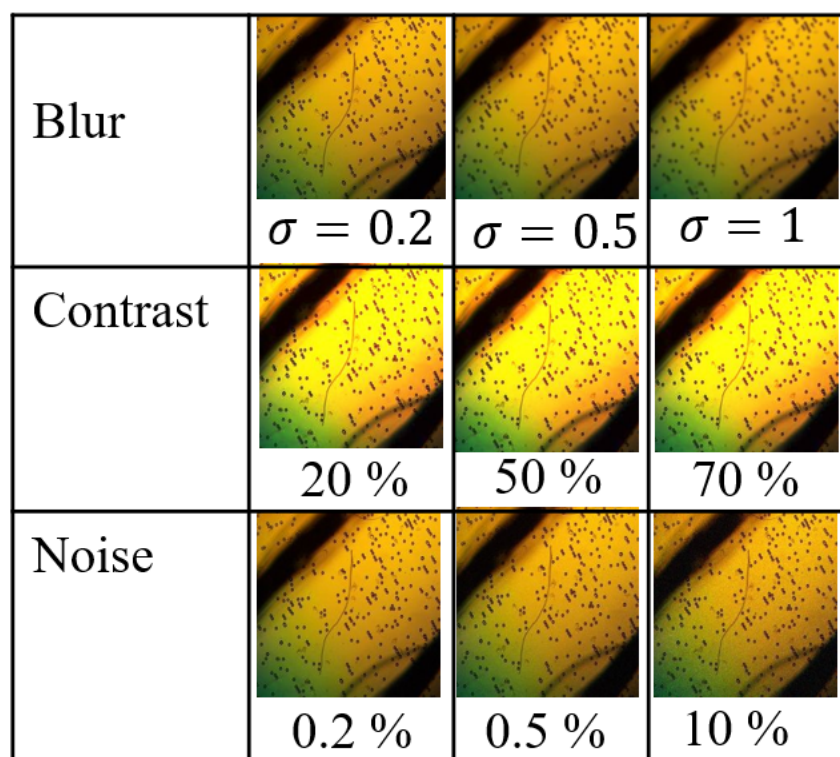

Figure S6: Examples of adversarial sample images with varying Blur, contrast and, noise levels

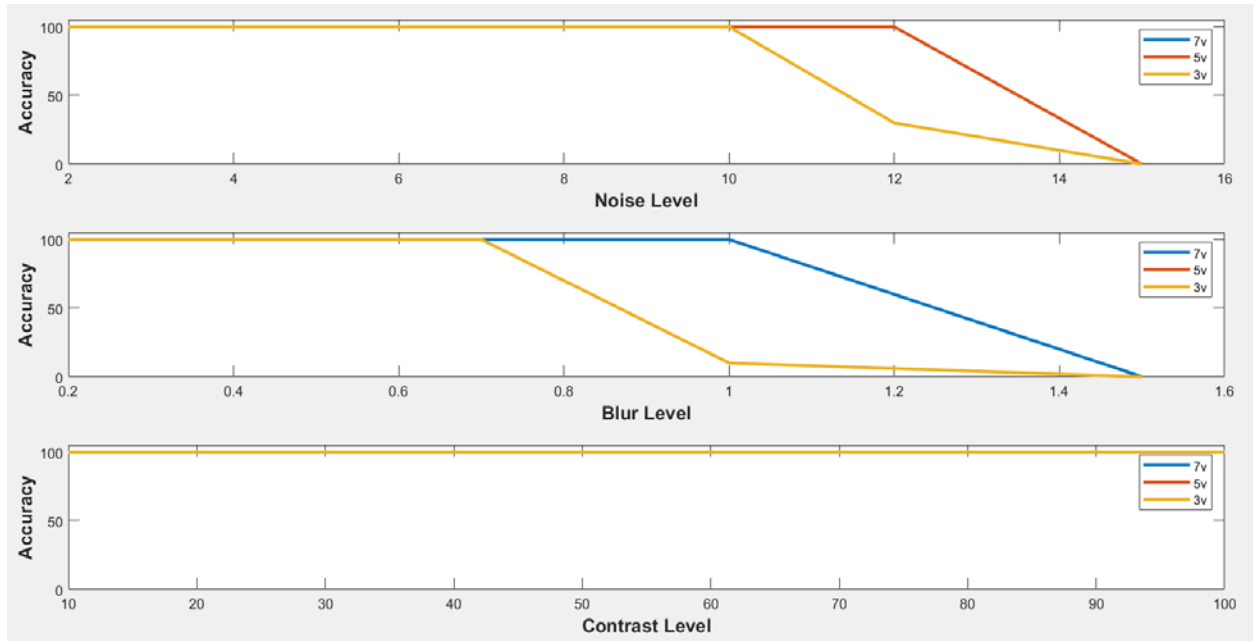

Figure S7: Performance of MobileNetV2 on Adversarial Sample.

Table S1: Performance result of MobileNetV2 on adversarial samples using 7 V Dataset

| Images   |           | Number | Accuracy |
|----------|-----------|--------|----------|
| Original |           | 5/5    | 100%     |
| Noise    | 2%        | 5/5    | 100%     |
|          | 5%        | 5/5    | 100%     |
|          | 7%        | 5/5    | 100%     |
|          | 10%       | 5/5    | 100%     |
|          | 12%       | 5/5    | 100%     |
|          | 15%       | 0/5    | 0%       |
| Contrast | 10%       | 5/5    | 100%     |
|          | 20%       | 5/5    | 100%     |
|          | 50%       | 5/5    | 100%     |
|          | 70%       | 5/5    | 100%     |
|          | 90%       | 5/5    | 100%     |
|          | 100%      | 5/5    | 100%     |
| Blur     | Value 0.2 | 5/5    | 100%     |
|          | Value 0.5 | 5/5    | 100%     |
|          | Value 0.7 | 5/5    | 100%     |
|          | Value 1   | 5/5    | 100%     |
|          | Value 1.5 | 0/5    | 0%       |

Table S2: Performance result of MobileNetV2 on adversarial samples using 5 V Dataset

| Images   |           | Number | Accuracy |
|----------|-----------|--------|----------|
| Original |           | 5/5    | 100%     |
| Noise    | 2%        | 5/5    | 100%     |
|          | 5%        | 5/5    | 100%     |
|          | 7%        | 5/5    | 100%     |
|          | 10%       | 5/5    | 100%     |
|          | 12%       | 3/5    | 30%      |
|          | 15%       | 0/5    | 0%       |
| Contrast | 10%       | 5/5    | 100%     |
|          | 20%       | 5/5    | 100%     |
|          | 50%       | 5/5    | 100%     |
|          | 70%       | 5/5    | 100%     |
|          | 90%       | 5/5    | 100%     |
|          | 100       | 5/5    | 100%     |
| Blur     | Value 0.2 | 5/5    | 100%     |
|          | Value 0.5 | 5/5    | 100%     |
|          | Value 0.7 | 5/5    | 100%     |
|          | Value 1   | 1/5    | 10%      |
|          | Value 1.5 | 0/5    | 0%       |

Table S3: Performance result of MobileNetV2 on adversarial samples using 3 V Dataset

| Images   |           | Number | Accuracy |
|----------|-----------|--------|----------|
| Original |           | 5/5    | 100%     |
| Noise    | 2%        | 5/5    | 100%     |
|          | 5%        | 5/5    | 100%     |
|          | 7%        | 5/5    | 100%     |
|          | 10%       | 5/5    | 100%     |
|          | 12%       | 5/5    | 100%     |
|          | 15%       | 0/5    | 0%       |
| Contrast | 10%       | 5/5    | 100%     |
|          | 20%       | 5/5    | 100%     |
|          | 50%       | 5/5    | 100%     |
|          | 70%       | 5/5    | 100%     |
|          | 90%       | 5/5    | 100%     |
|          | 100%      | 5/5    | 100%     |
| Blur     | Value 0.2 | 1/5    | 100%     |
|          | Value 0.5 | 0/5    | 100%     |
|          | Value 0.7 | 0/5    | 100%     |
|          | Value 1   | 0/5    | 10%      |
|          | Value 1.5 | 0/5    | 0%       |
